# Supplementary material for: A novel hypoxic long noncoding RNA KB-1980E6.3 maintains breast cancer stem cell stemness via interacting with IGF2BP1 to facilitate c-Myc mRNA stability
Source: PubMed Central journal article supplement (PMC7932928; doi:10.1038/s41388-020-01638-9), 2021-01-19

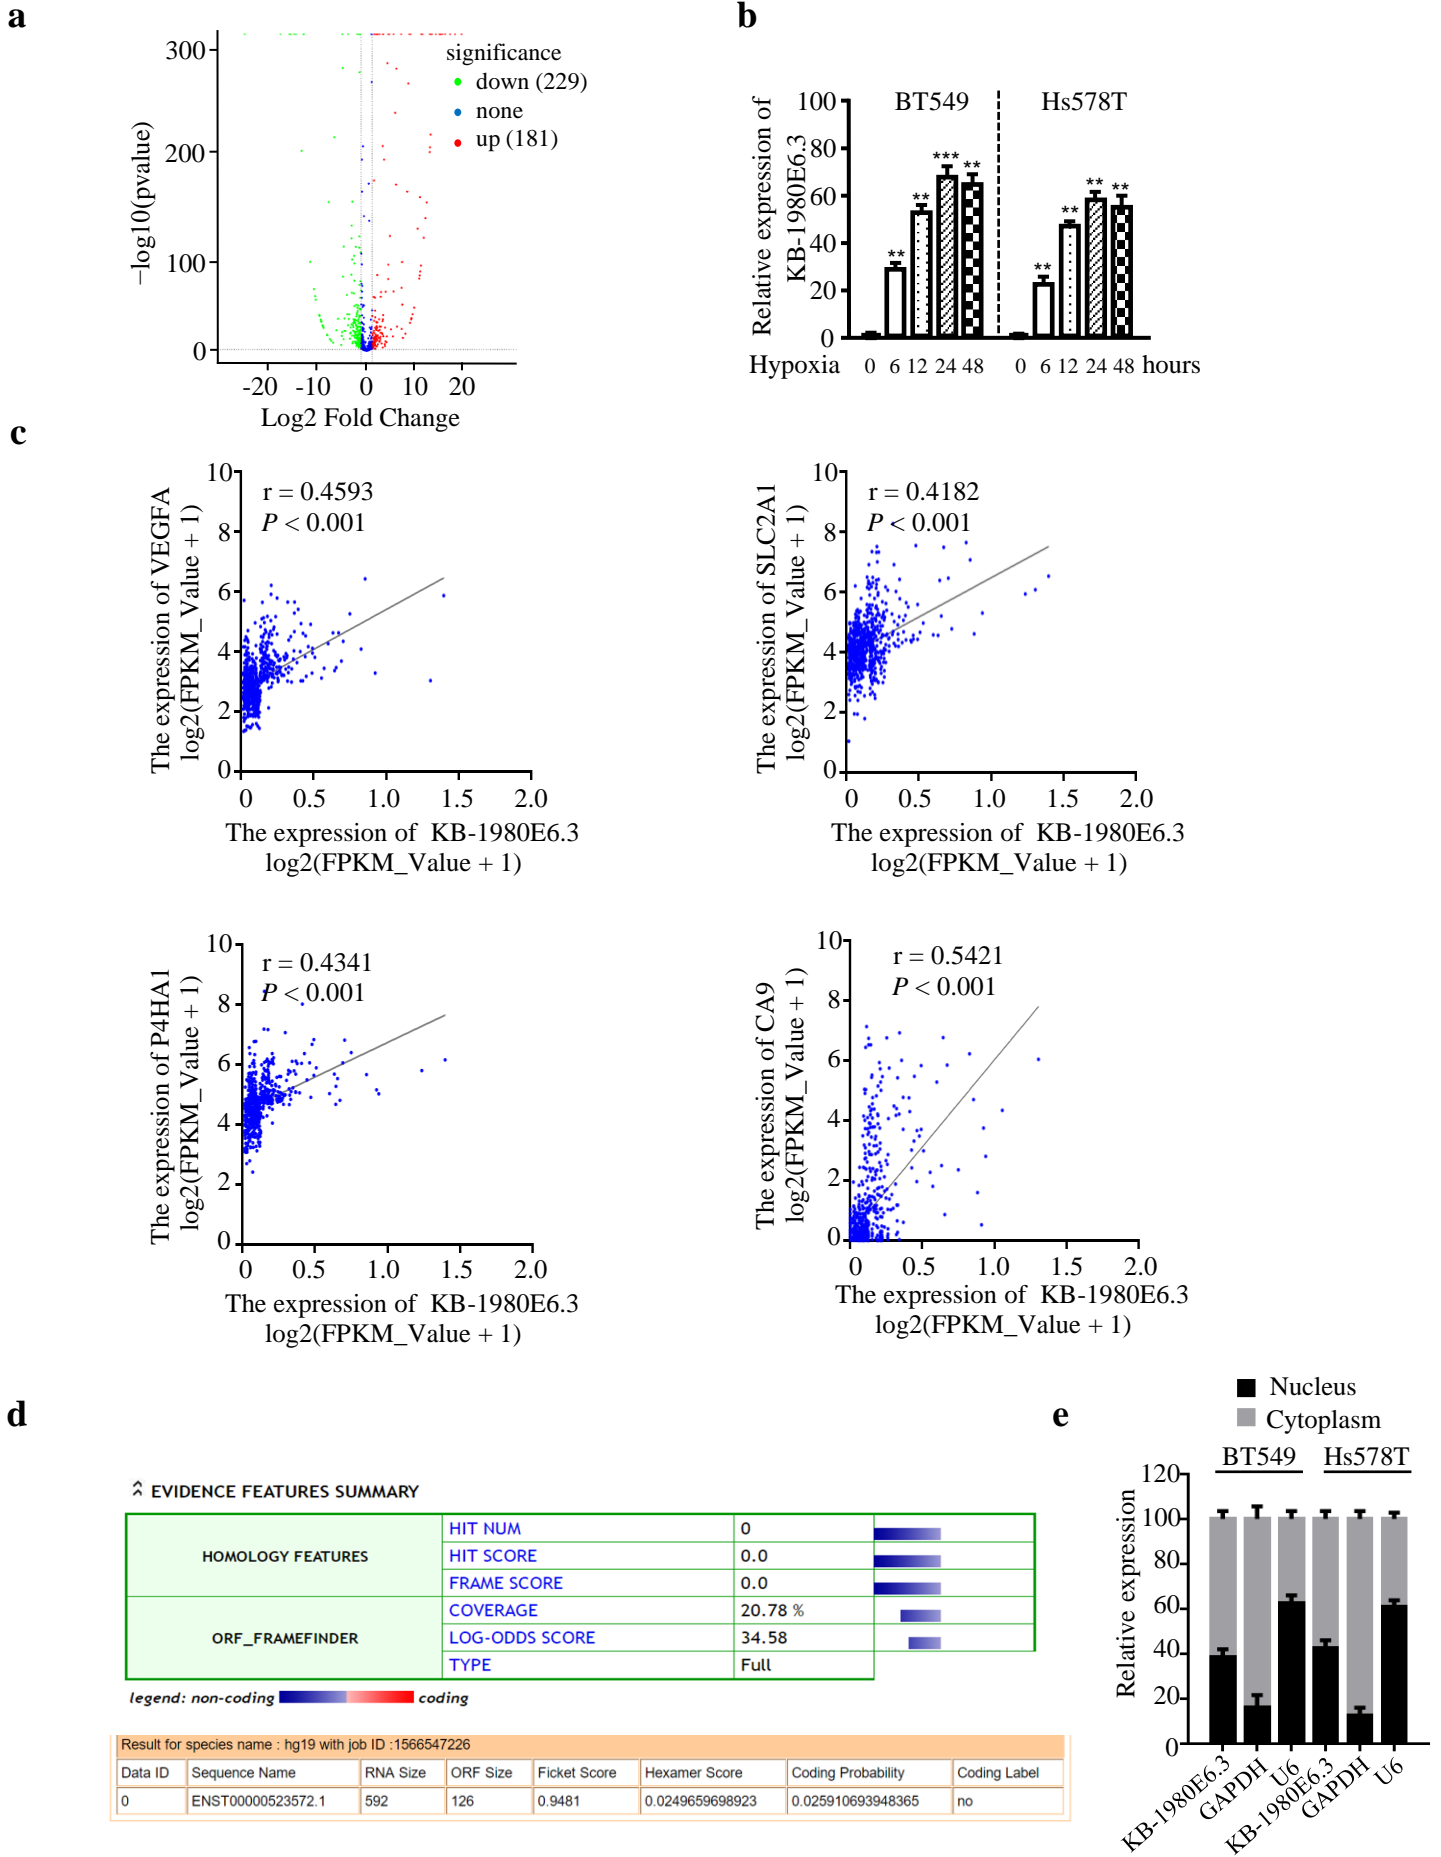

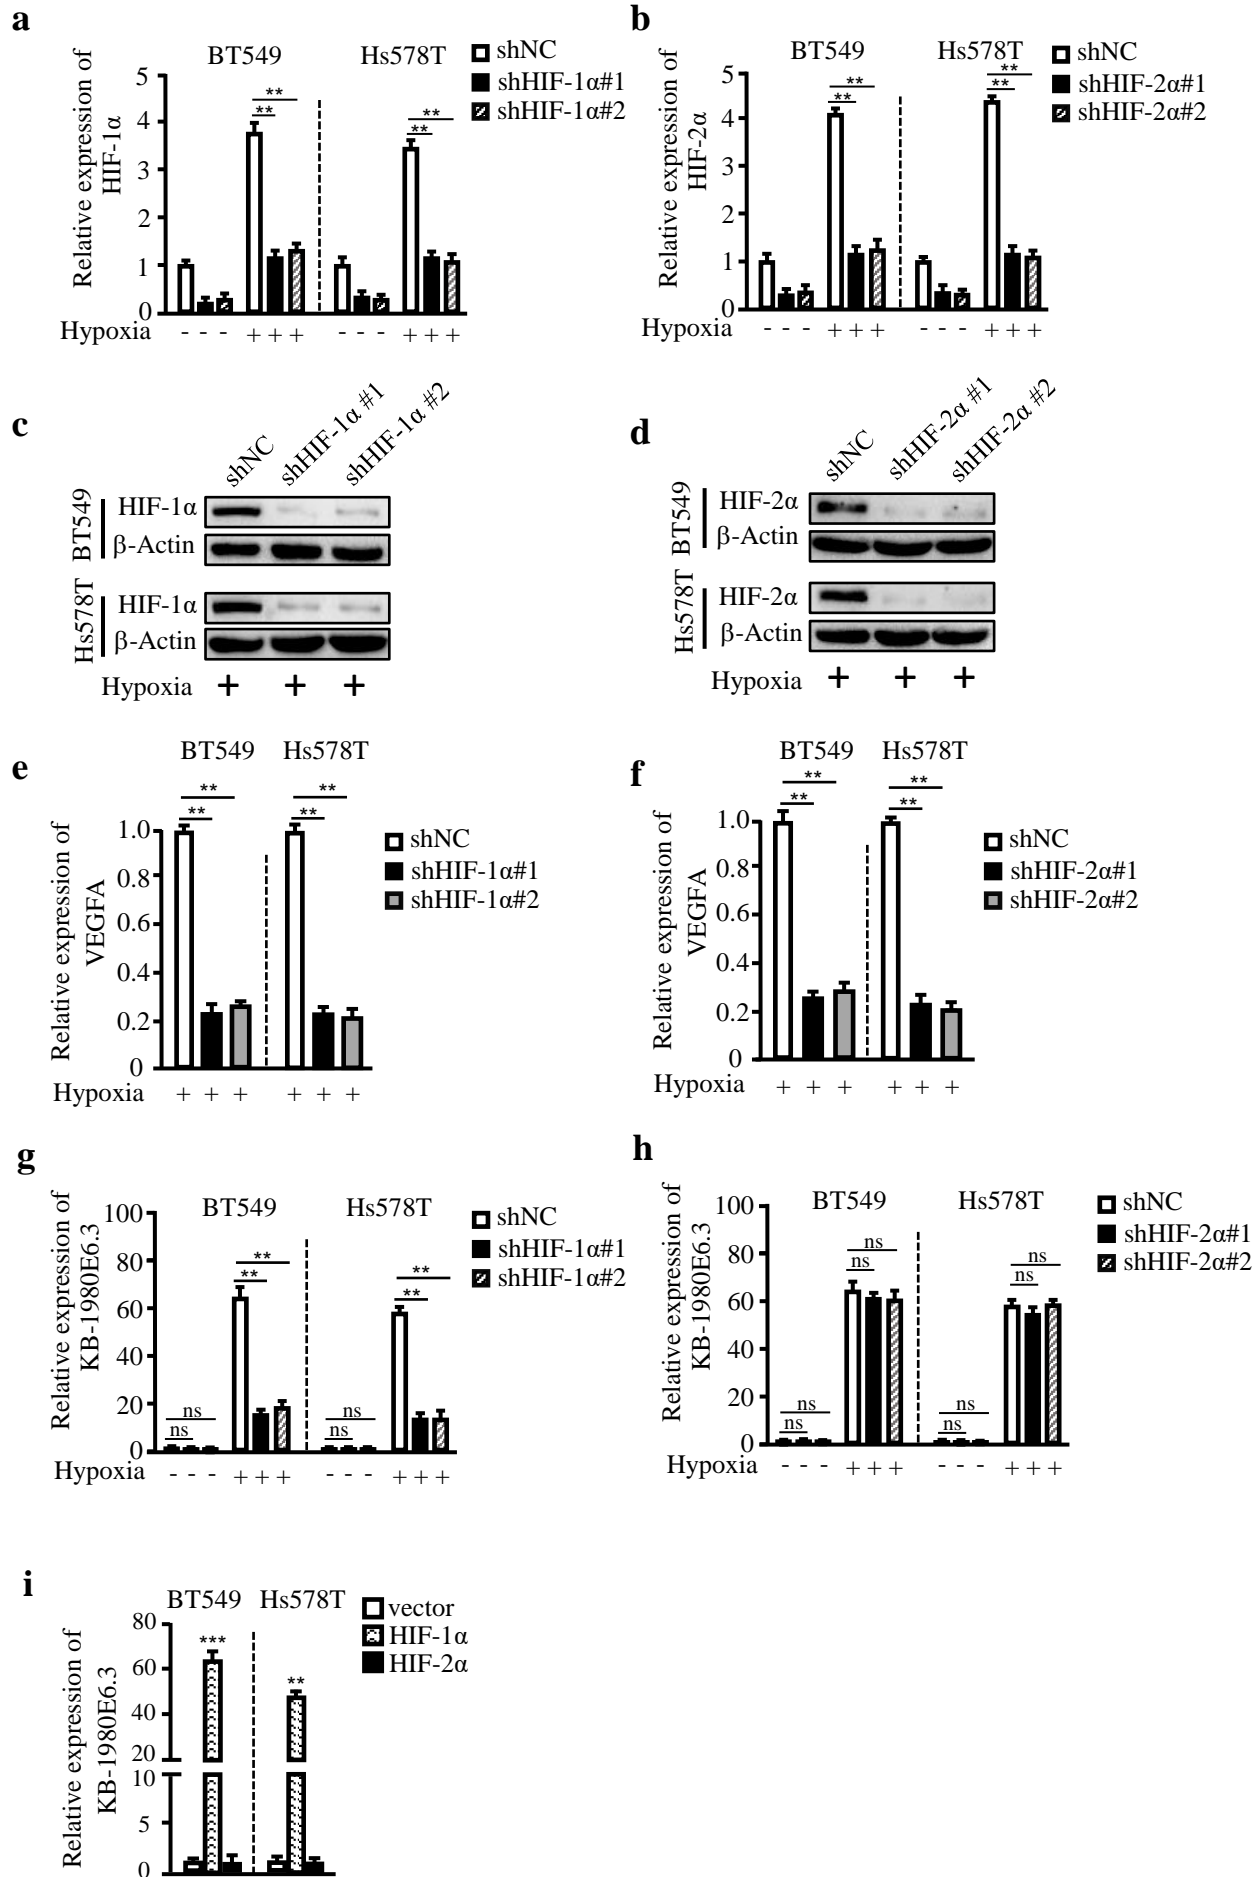

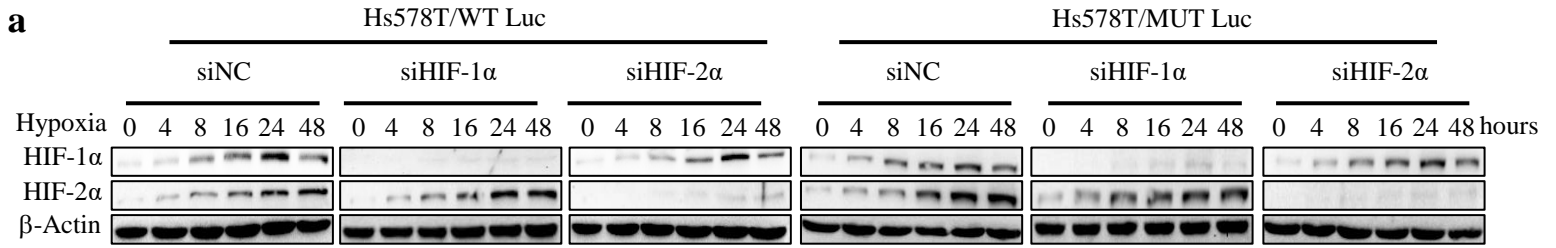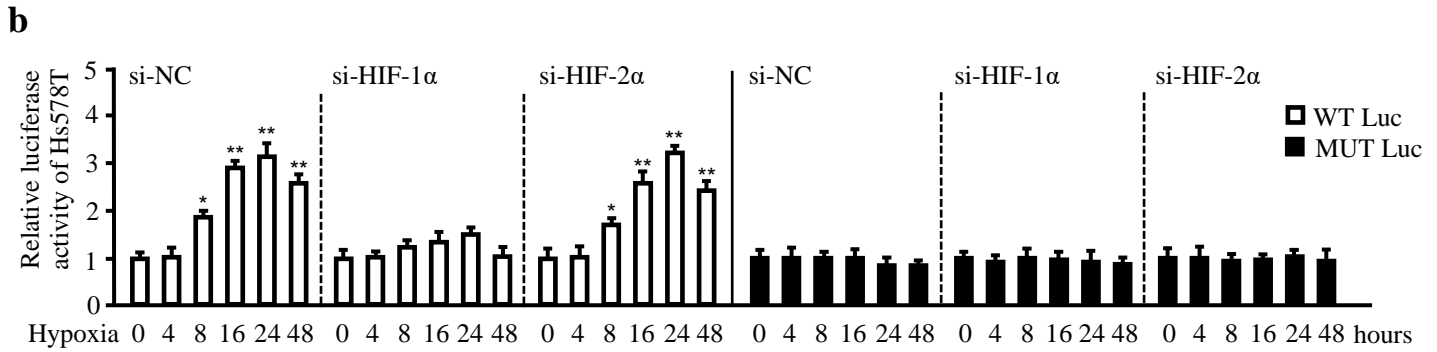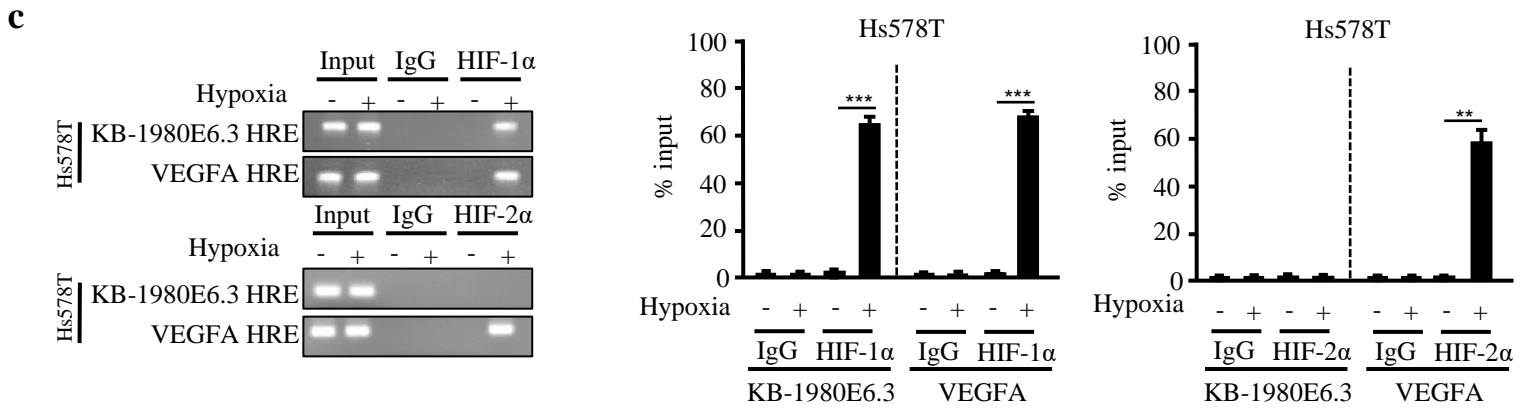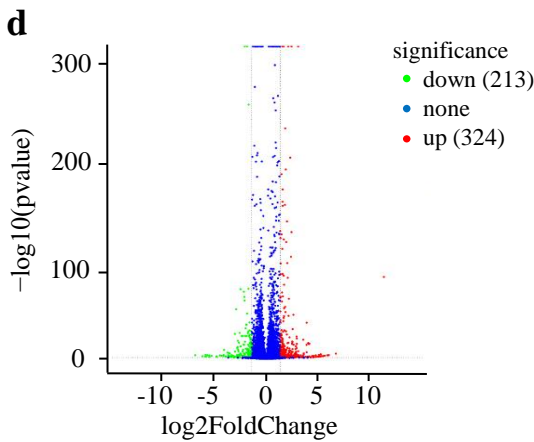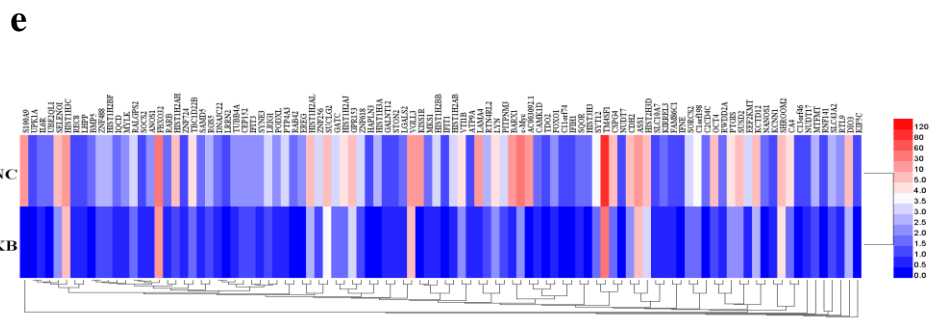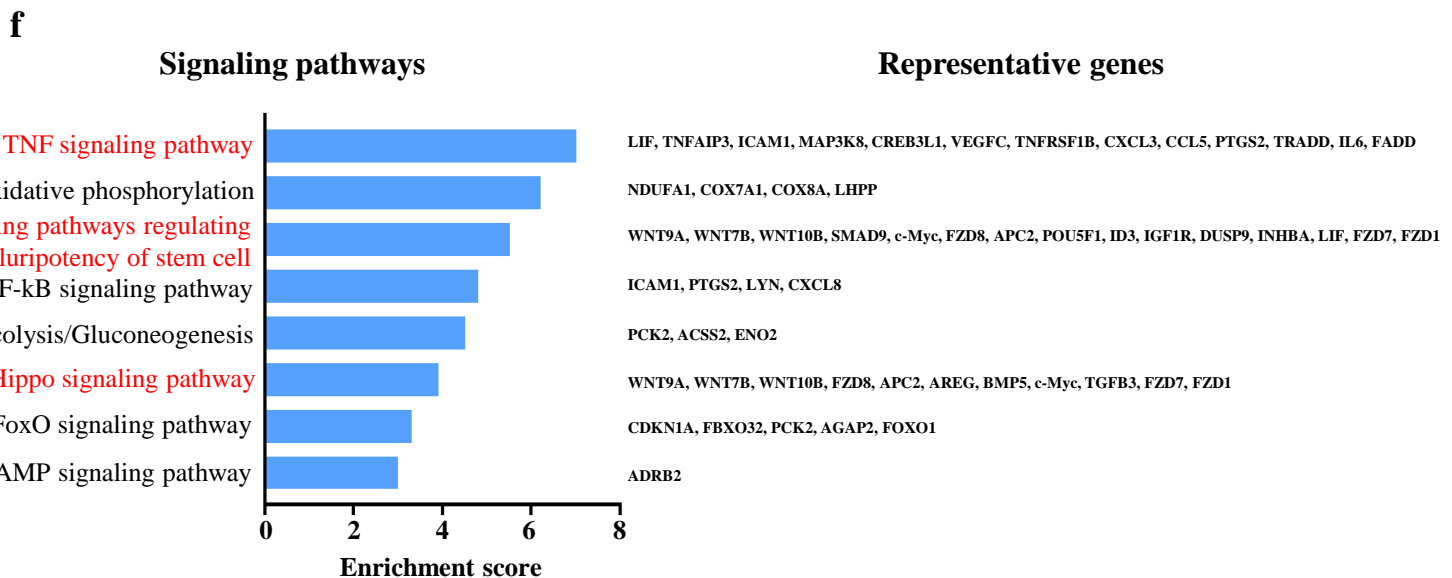

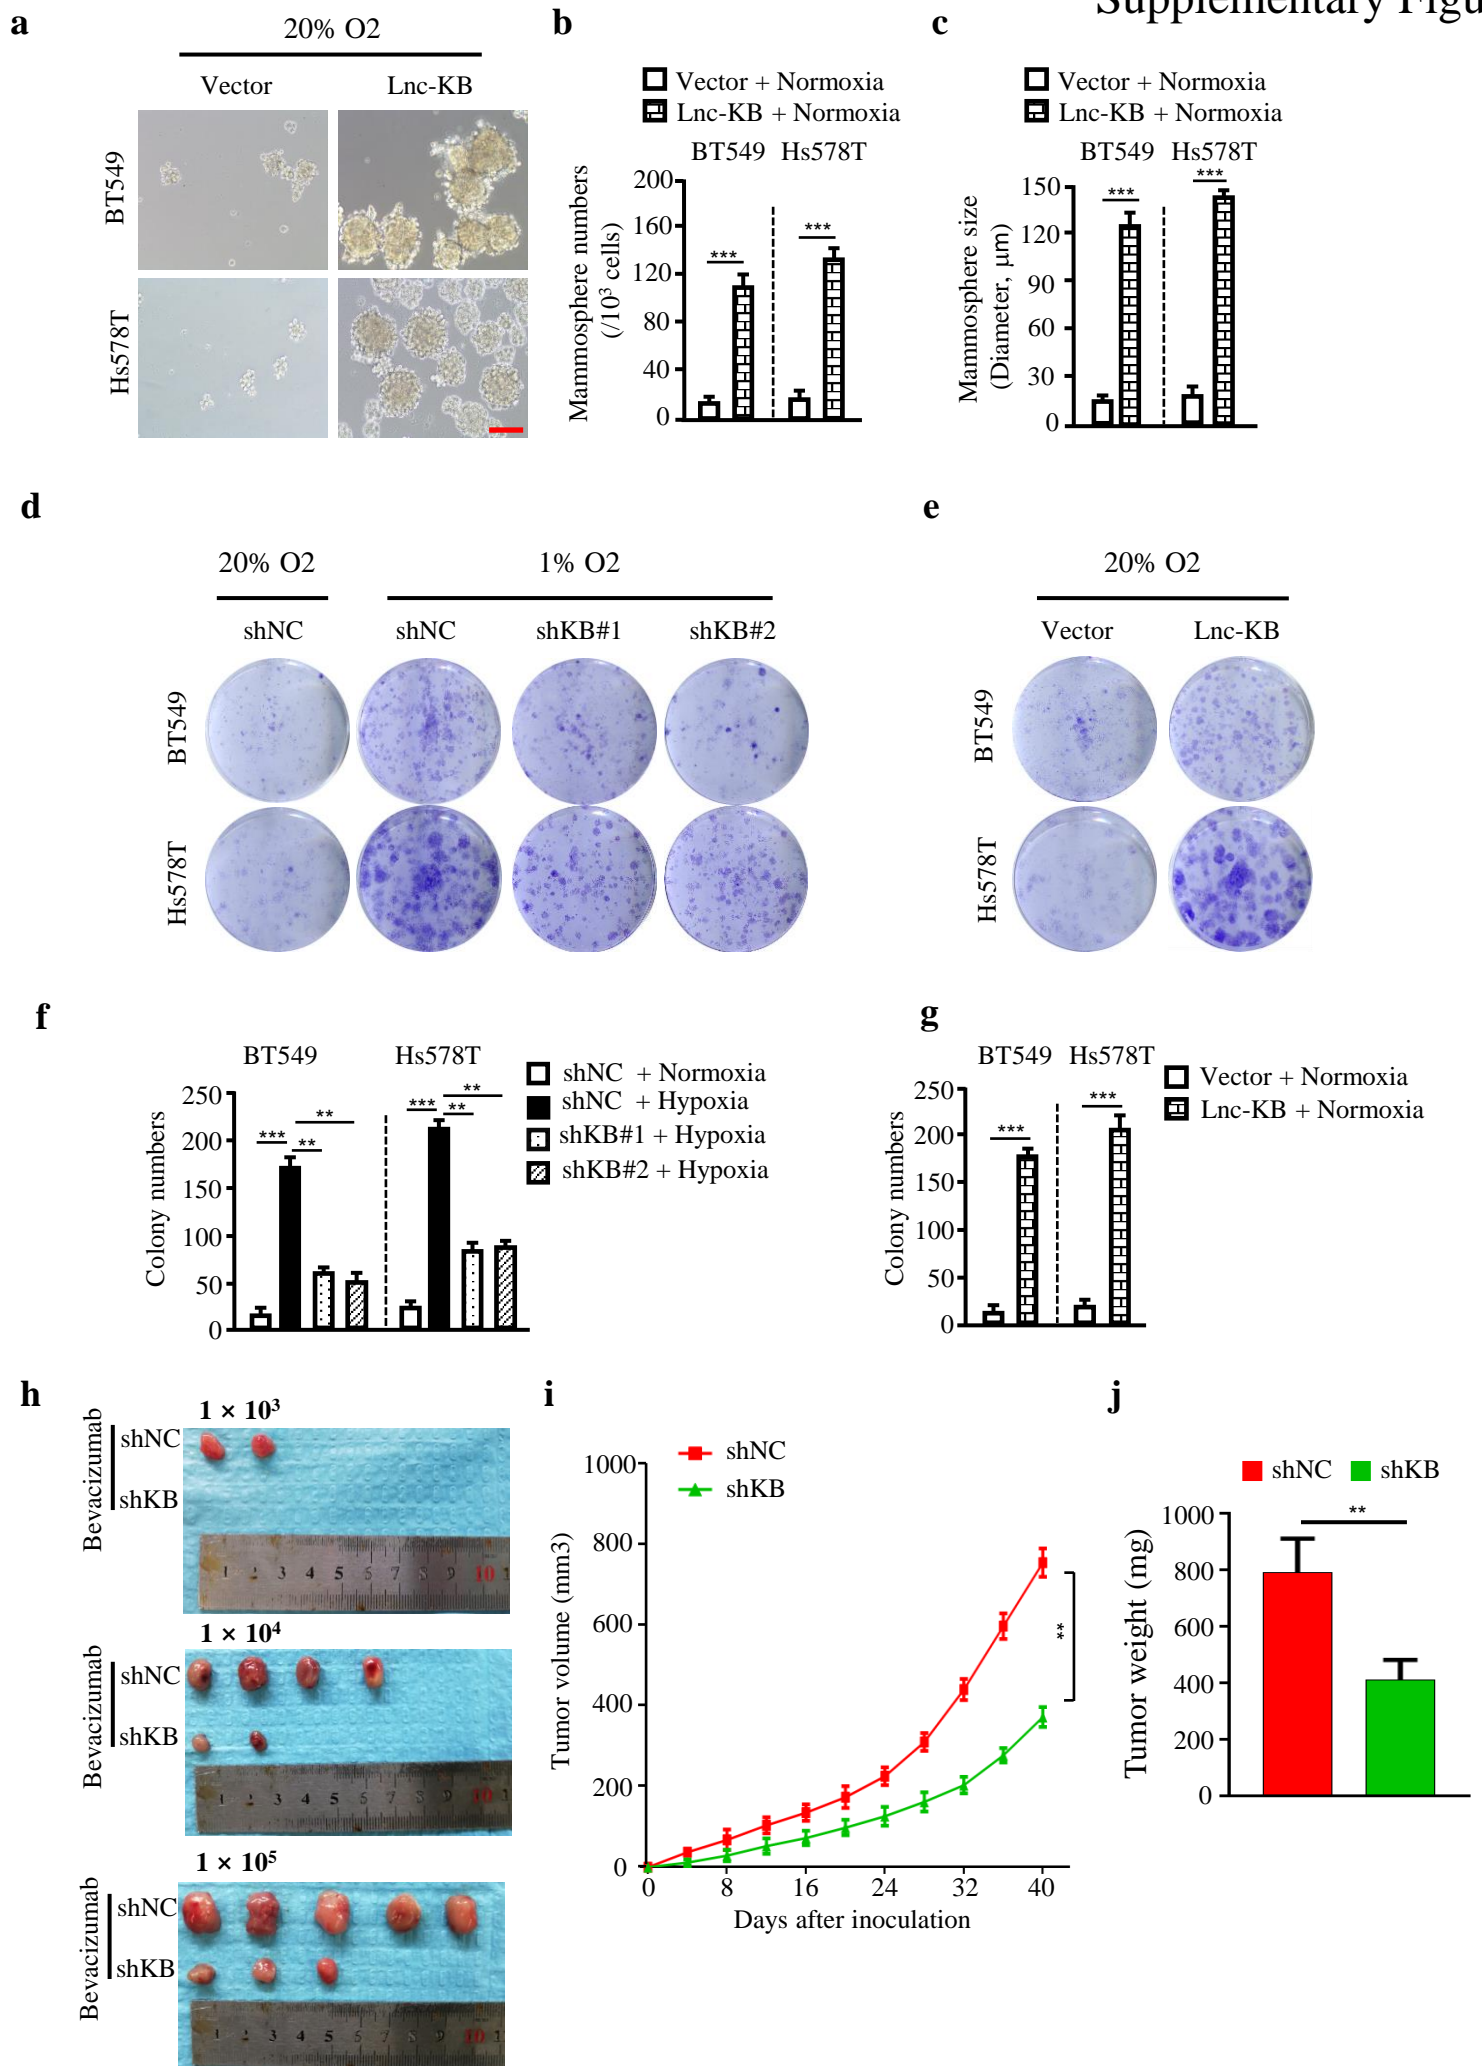



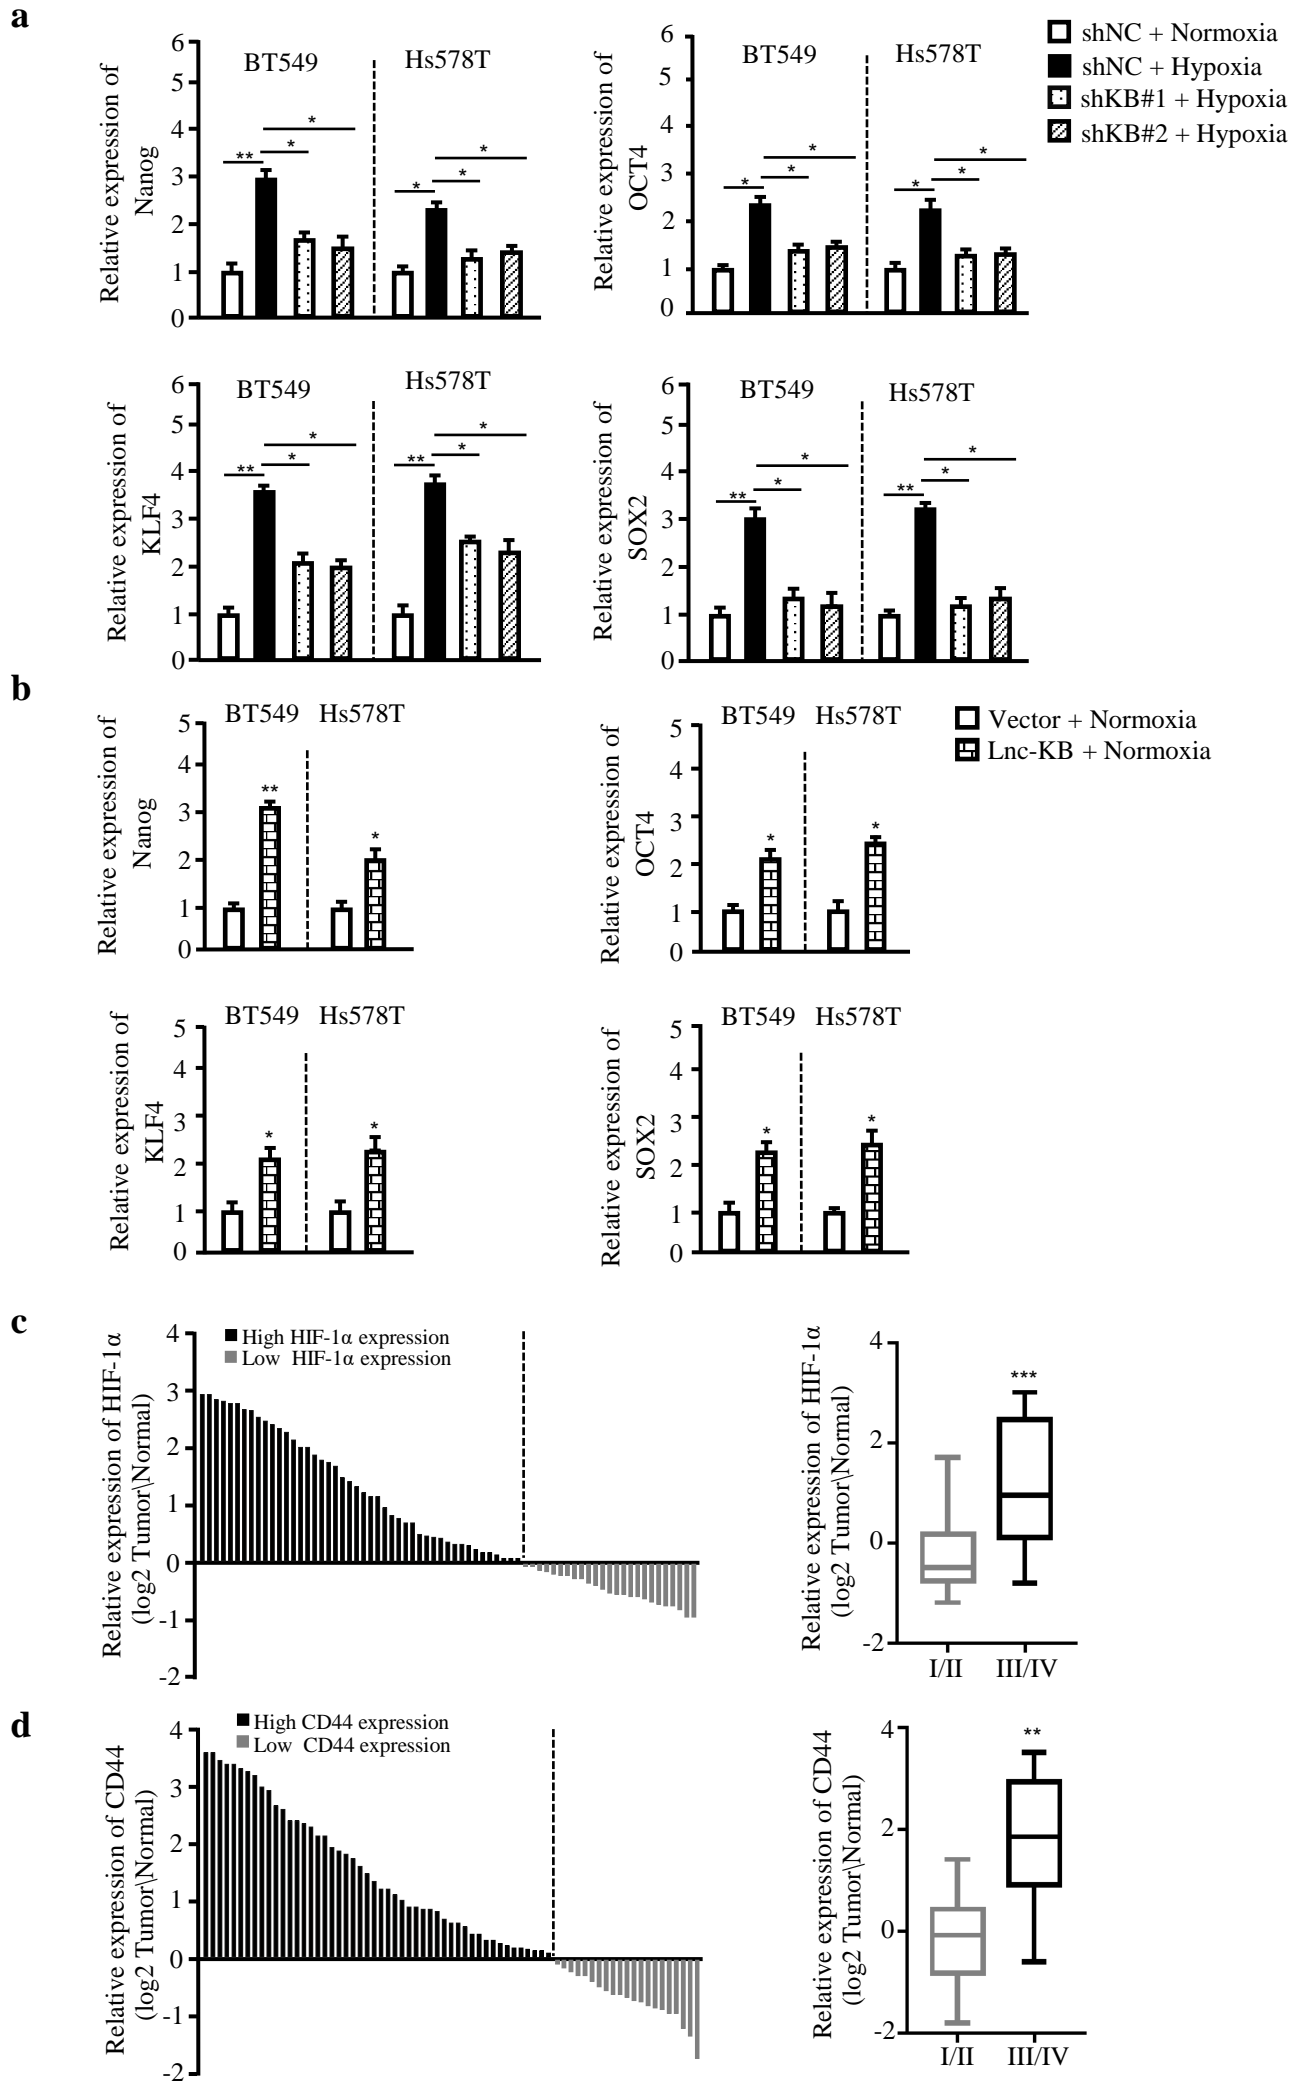

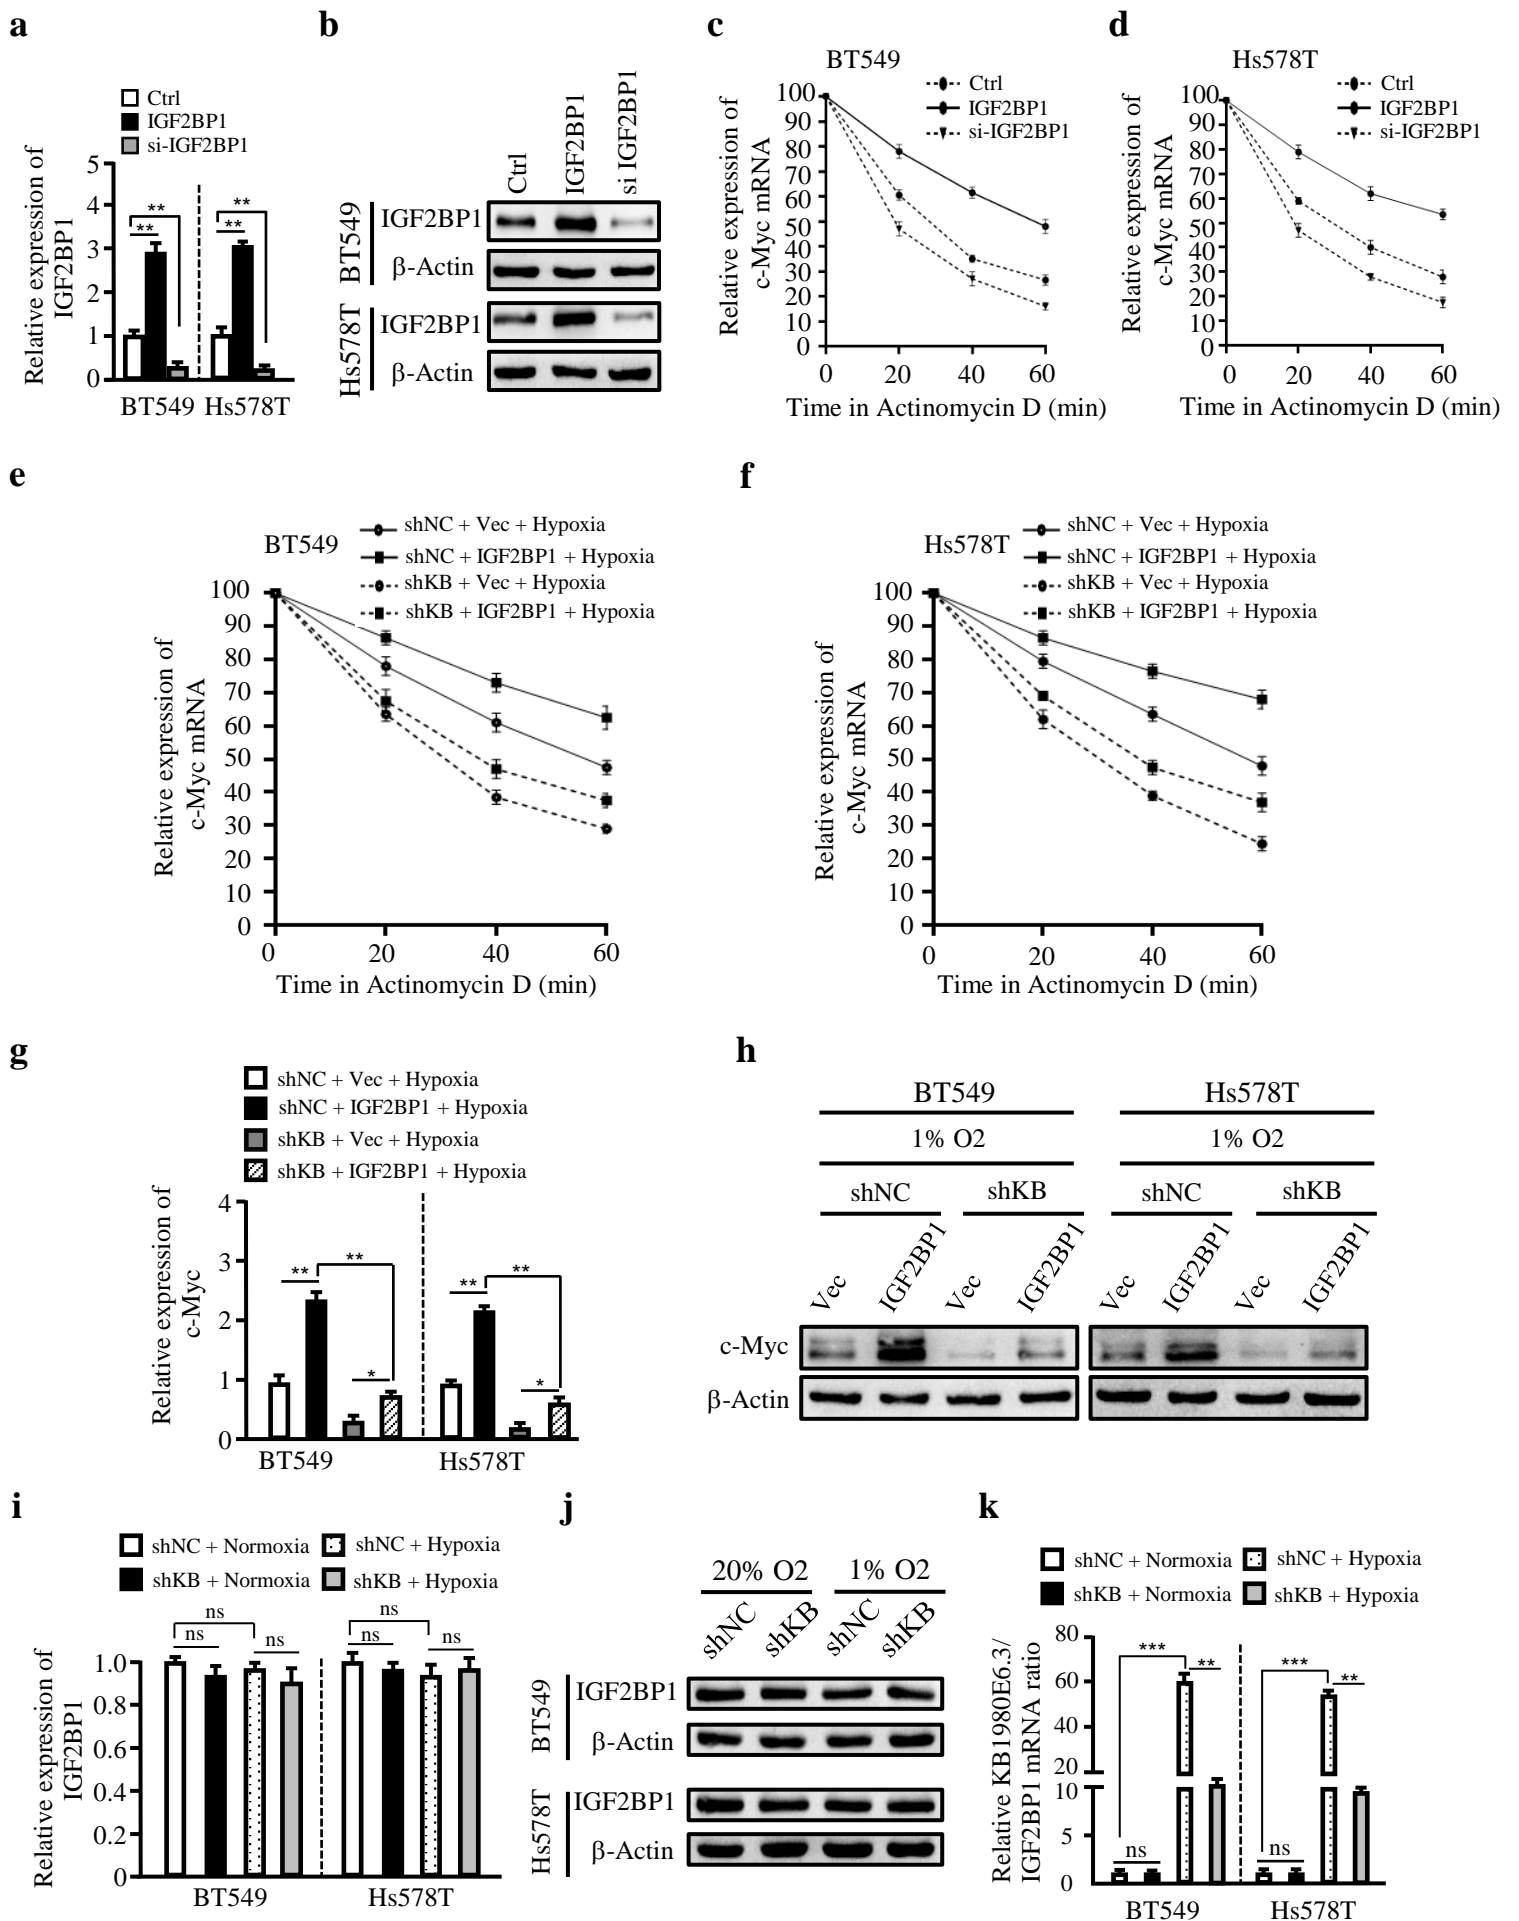

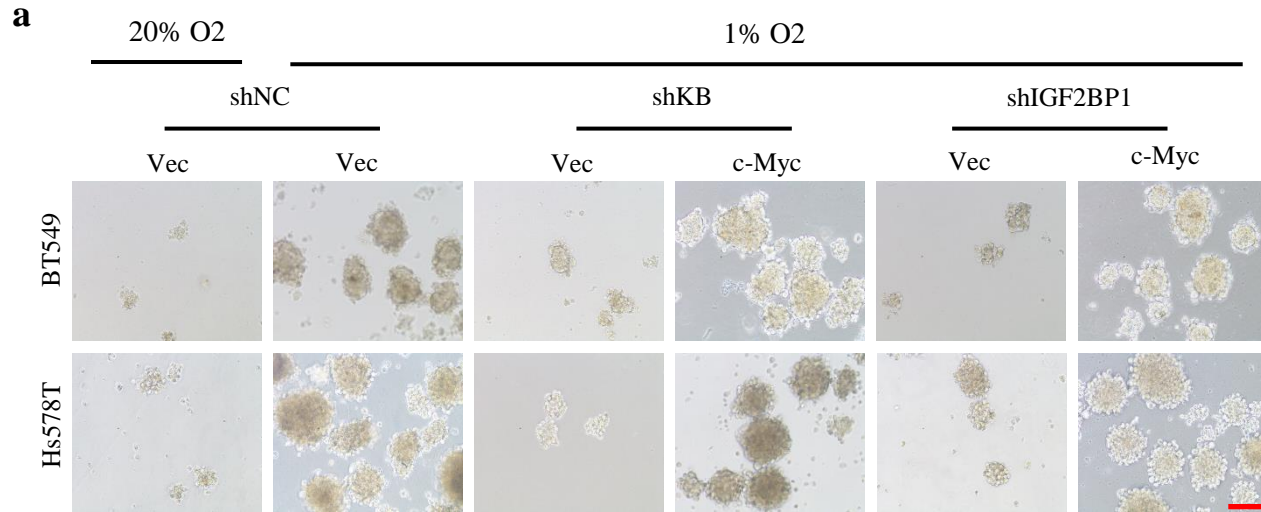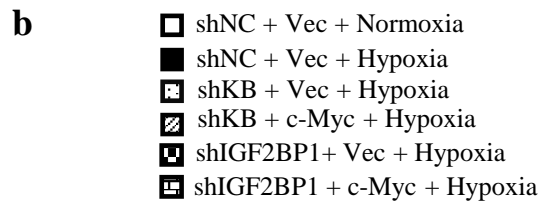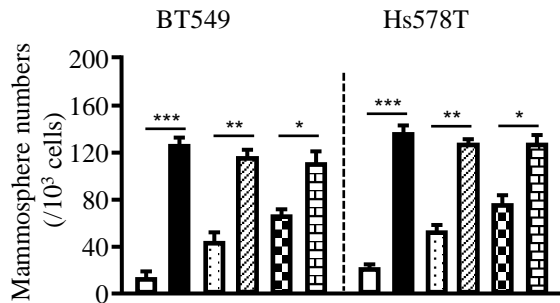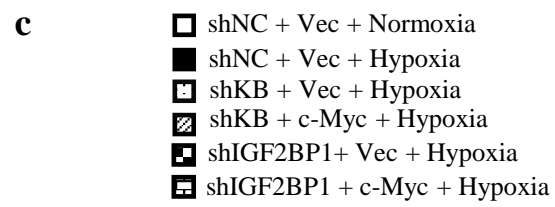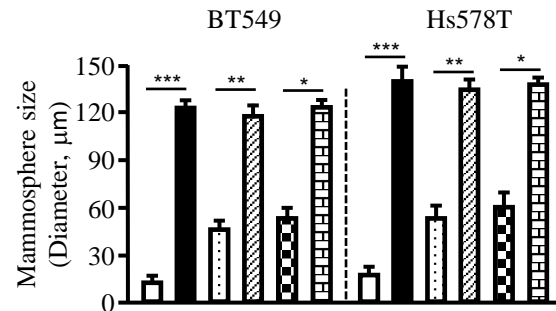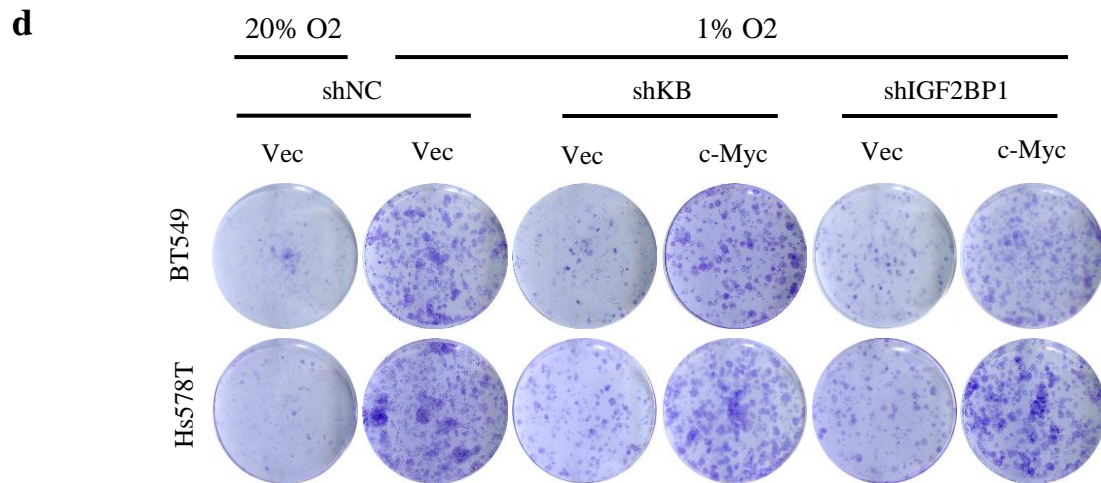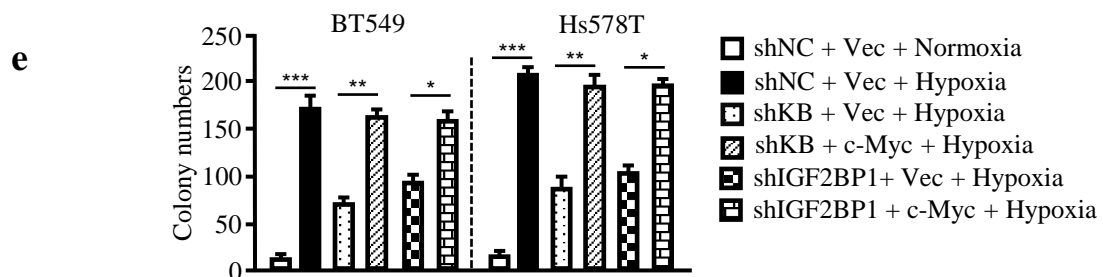



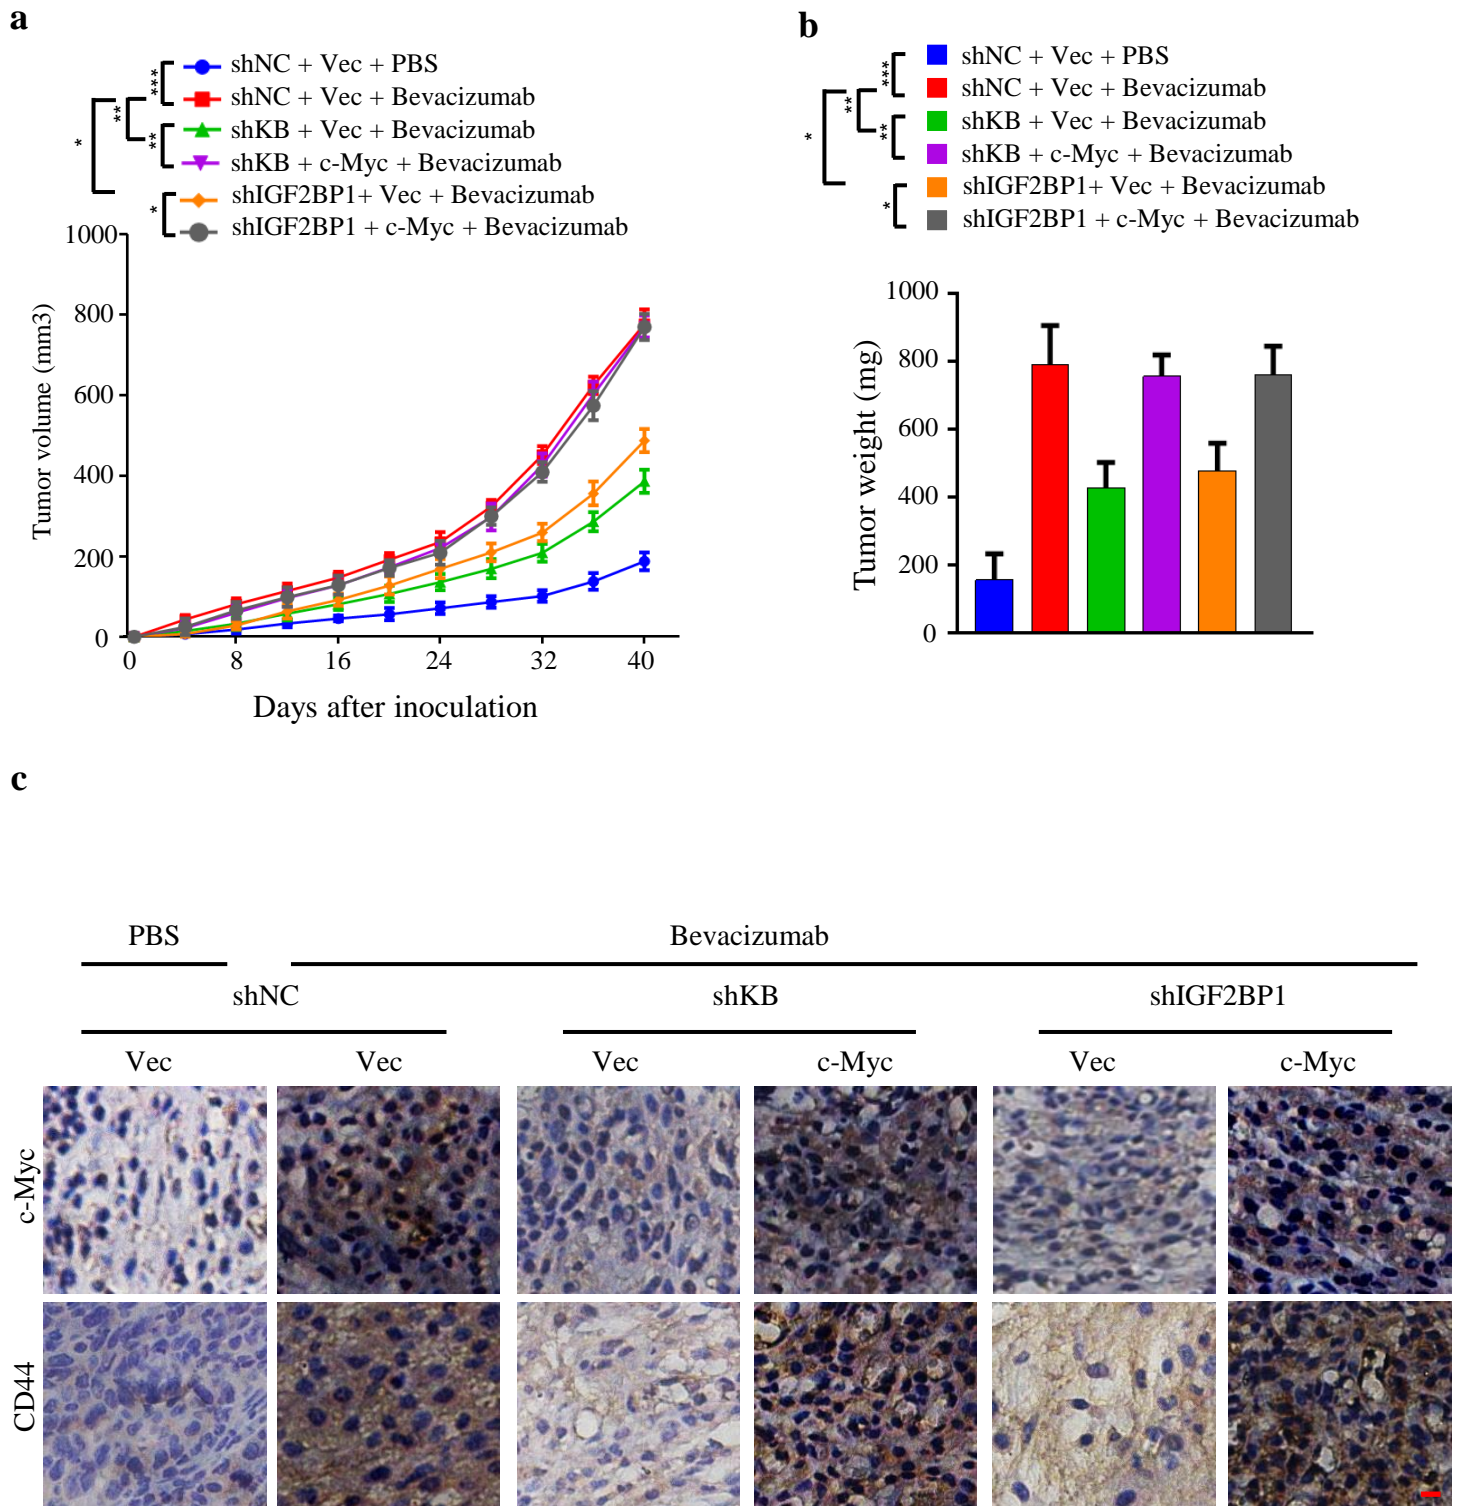

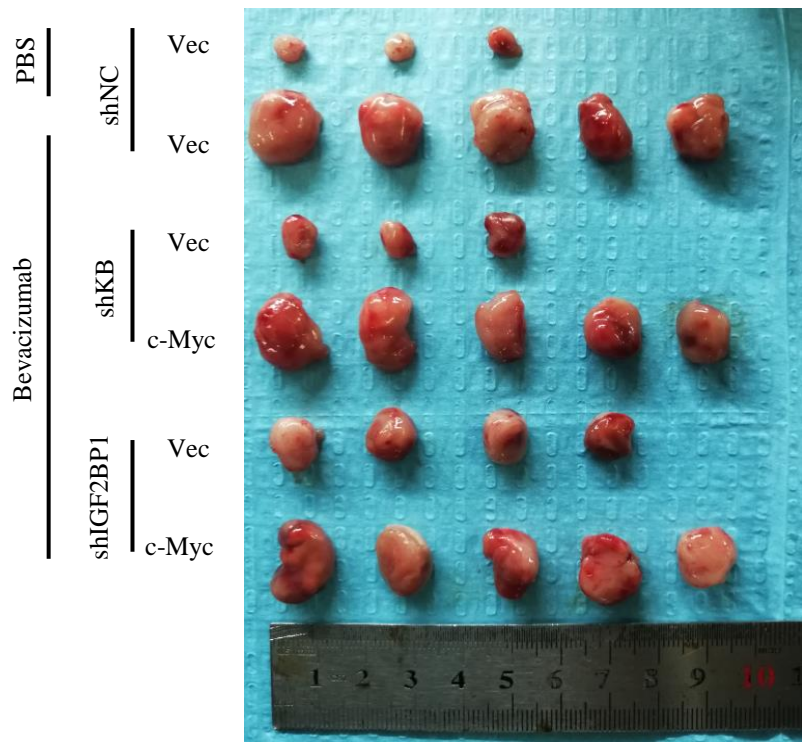

Supplement: 41388_2020_1638_MOESM2_ESM.pdf [file 41388_2020_1638_MOESM2_ESM.pdf]
